# Supplementary material for: Terpenoids and Phytocannabinoids Co-Produced in Cannabis Sativa Strains Show Specific Interaction for Cell Cytotoxic Activity
Source: PubMed Central journal article supplement (PMC6749504; doi:10.3390/molecules24173031), 2019-08-21
Supplement: molecules-24-03031-s001.pdf [file molecules-24-03031-s001.pdf]

**Supplementary Table 1.** Dataset used for Principle Component Analysis (PCA) for the statistical calculation of correlation between terpenoids and phytocannabinoids. Relative amounts (%) of cannabinoids and terpenoids and terpenes extrapolated from the ethanolic extracts of the different strains, analyzed by GC/MS (for terpenoids) and HPLC (for phytocannabinoids).

|             | ARBEL    | DQ       | PARIS    | SCBD     | ROMA     | CS11     | CS12     | CS13     | CS14     | 38P25    | 38P28    | 40P38    | 61-P17   | 71P01    | 71P21    | 71P38    | 61P31    |
|-------------|----------|----------|----------|----------|----------|----------|----------|----------|----------|----------|----------|----------|----------|----------|----------|----------|----------|
| a-Pinene    | 33.70935 | 2.644466 | 1.741851 | 1.319345 | 2.644466 | 0.893542 | 0.264483 | 1.015493 | 0.09953  | 0        | 0        | 0.385925 | 0        | 0        | 0        | 0.34934  | 0.44263  |
| Camphen     | 0        | 0.911742 | 0.253615 | 0        | 0.911742 | 0        | 0        | 0        | 0        | 0        | 0        | 0        | 0        | 0        | 0        | 0        | 0        |
| b-Pinene    | 5.887975 | 4.105363 | 0.35797  | 0.11743  | 4.105363 | 0.404154 | 0.418617 | 0.284632 | 0.184364 | 0        | 0        | 0.424498 | 0        | 0        | 0        | 0.159257 | 0.250486 |
| b-Myrcen    | 10.22105 | 8.291656 | 0.431333 | 0        | 8.291656 | 3.287882 | 1.513924 | 0.564683 | 0.684408 | 0        | 0        | 0.219599 | 0        | 0.448022 | 0        | 0.998748 | 4.697048 |
| D-Limon     | 4.57028  | 19.5361  | 0        | 0        | 19.5361  | 0.205292 | 0.946712 | 0.63387  | 0.50752  | 0        | 0        | 0.64215  | 0        | 0        | 0.981158 | 0.117499 | 0.630003 |
| b-Ocimen    | 0        | 0        | 0        | 0        | 0        | 0.098133 | 1.646752 | 0.537605 | 0.878997 | 0        | 0        | 0.355473 | 0        | 0.218558 | 0.630312 | 0.138345 | 0        |
| Linalool    | 0.891147 | 2.01912  | 0        | 0        | 2.01912  | 0.24625  | 5.884169 | 0        | 0        | 0        | 0        | 0.164867 | 0        | 0        | 0        | 0.059334 | 0.15506  |
| Fenchol     | 0.929556 | 2.333249 | 0        | 0        | 2.333249 | 0.023359 | 0        | 0.135476 | 0.099751 | 0        | 0        | 0        | 0        | 0        | 0        | 0.0401   | 0.069953 |
| Terpinol    | 0.722785 | 0        | 0        | 0        | 0        | 0        | 0        | 0        | 1.943966 | 0        | 0        | 0        | 0        | 0        | 0        | 0        | 0        |
| Thymol      | 0        | 0        | 0        | 0        | 0        | 0        | 0.109916 | 0        | 0.08119  | 0        | 0        | 0        | 0        | 0        | 0        | 0        | 0        |
| trans-2-pi  | 0        | 0        | 0        | 0        | 0        | 0.078786 | 0        | 0.090596 | 0        | 0        | 0        | 0        | 0        | 0        | 0        | 0.029636 | 0.030157 |
| Borneol     | 0.514094 | 0.484349 | 0        | 0        | 0.484349 | 0.03821  | 0.207334 | 0        | 0.082301 | 0        | 0        | 0        | 0        | 0        | 0        | 0.106664 | 0.077255 |
| a-Terpine   | 0.7903   | 1.229534 | 0        | 0        | 1.229534 | 0.062221 | 0.12897  | 0.129299 | 0.117268 | 0        | 0        | 0        | 0        | 0        | 0.947233 | 0.071213 | 0.039442 |
| b-Caryoph   | 8.160237 | 22.42164 | 1.506981 | 0.442656 | 22.42164 | 0.315696 | 2.015453 | 1.529001 | 1.71554  | 1.579108 | 1.092053 | 0.557975 | 2.296565 | 0.261311 | 3.653075 | 0.714533 | 1.511396 |
| trans-a-B   | 1.029883 | 0        | 0.473055 | 0.300809 | 0        | 0        | 0.494297 | 0        | 0.345588 | 1.617721 | 0.399074 | 0.282772 | 0.886647 | 0.149725 | 0        | 0.028851 | 0.036501 |
| a-Element   | 0        | 1.724134 | 0        | 0        | 1.724134 | 0        | 0        | 0        | 0        | 0        | 0        | 0        | 0        | 0        | 0        | 0        | 0        |
| c-Element   | 0        | 0        | 0        | 0        | 0        | 0.126301 | 0        | 0        | 0        | 0        | 2.534294 | 0        | 0        | 0        | 0        | 0        | 0        |
| a-Guaiene   | 0        | 0        | 0        | 0        | 0        | 0        | 0.336772 | 0        | 0.223787 | 0        | 0        | 1.353014 | 0        | 0        | 0        | 0        | 0        |
| b-Famese    | 0        | 0        | 0        | 0        | 0        | 0        | 0.760676 | 0.025688 | 0.593275 | 0.559401 | 0.906853 | 0        | 0        | 0        | 0        | 0        | 0        |
| Humulene    | 2.436843 | 5.797492 | 0.292432 | 0.163032 | 5.797492 | 0.079284 | 0.626788 | 0.625335 | 0.512221 | 0.54166  | 0.544391 | 1.154307 | 0.978989 | 1.65248  | 1.075531 | 0.255499 | 0.030362 |
| a-Bisabol   | 1.647701 | 0        | 0        | 0        | 0        | 0        | 0.101266 | 0        | 0        | 0        | 0        | 0        | 0.368977 | 0        | 0        | 0        | 0        |
| Alloaroma   | 0        | 1.286662 | 0        | 0        | 1.286662 | 0        | 0        | 0        | 0        | 0        | 0        | 0        | 0        | 0        | 0        | 0.022943 | 0.072463 |
| d-Selinen   | 0        | 0        | 0.259246 | 0.231125 | 0        | 0        | 0.292621 | 0.30291  | 0.191061 | 0        | 0        | 0        | 0        | 0        | 0        | 0.022964 | 0.077007 |
| a-Famese    | 0        | 0        | 0        | 0        | 0        | 0.024047 | 0        | 0.150563 | 0        | 0        | 0        | 0        | 0        | 0        | 0.290514 | 0.090038 | 0.19709  |
| Patcholen   | 6.549357 | 0        | 0        | 0        | 0        | 0        | 0        | 0        | 0        | 0        | 0        | 0        | 0        | 0        | 0        | 0        | 0        |
| a-Bisabol   | 0        | 1.457027 | 0.464192 | 0.418879 | 1.457027 | 0.03195  | 0        | 0        | 0        | 0        | 0        | 0        | 0        | 0        | 0        | 0        | 0        |
| a-selinene  | 5.568251 | 0        | 0        | 0        | 0        | 0        | 0.220107 | 0        | 0.190713 | 0        | 0        | 0        | 0        | 0        | 0        | 0        | 0        |
| a-Famese    | 0        | 0        | 0        | 0        | 0        | 0        | 0.265049 | 0        | 0.202643 | 0        | 0        | 0.192477 | 0        | 0.221042 | 0        | 0        | 0        |
| cis-a-Buln  | 0        | 0        | 0        | 0        | 0        | 0        | 0.598167 | 0        | 0.231727 | 0        | 0        | 0        | 0        | 0        | 0        | 0        | 0        |
| a-Muurole   | 0        | 1.179635 | 0        | 0        | 1.179635 | 0        | 0        | 0        | 0        | 0        | 0        | 0        | 0        | 0        | 0        | 0        | 0        |
| b-Cadiner   | 0        | 1.557537 | 0        | 0        | 1.557537 | 0        | 0        | 0        | 0        | 0        | 0        | 0        | 0        | 0        | 0        | 0        | 0        |
| Valencene   | 0        | 4.792179 | 0        | 0        | 4.792179 | 0        | 0        | 0        | 0        | 0        | 0        | 0        | 0        | 0        | 0        | 0        | 0        |
| p-Panasin   | 0        | 0        | 0        | 0        | 0        | 0.09554  | 0        | 0        | 0        | 0        | 0        | 0        | 0        | 0        | 0        | 0        | 0        |
| b-sesquip   | 0        | 0        | 0        | 0        | 0        | 0        | 0.149214 | 0        | 0.113737 | 0        | 0        | 0        | 0        | 0        | 0        | 0        | 0        |
| Selina-3,7  | 0        | 5.670836 | 0        | 0        | 5.670836 | 0.062702 | 0        | 0        | 0        | 0        | 0        | 0        | 0        | 0        | 0        | 0        | 0        |
| cis-a-Bisal | 0        | 0        | 0        | 0        | 0        | 0        | 0.120748 | 0        | 0.125088 | 0        | 0        | 0        | 0        | 0        | 0.156651 | 0        | 0        |
| c-Element   | 0        | 0.867778 | 0        | 0        | 0.867778 | 0.088556 | 0        | 0        | 0        | 0        | 0        | 0        | 0        | 0        | 0        | 0        | 0        |
| Nerolidol   | 0        | 0        | 0        | 0        | 0        | 0.225839 | 0.103109 | 0        | 0.179499 | 0        | 0        | 0        | 0        | 0        | 0        | 0        | 0.028811 |
| Guaiol      | 2.620685 | 0        | 0.841278 | 0.35382  | 0        | 0.544872 | 0        | 0        | 0        | 2.233998 | 5.081673 | 3.872181 | 6.063161 | 1.599367 | 3.901939 | 0.67002  | 0.133819 |
| c-Eudesm    | 2.833333 | 0        | 0.772596 | 0.384682 | 0        | 0.054038 | 0        | 0        | 0        | 2.125368 | 5.106661 | 4.845272 | 1.525972 | 2.29092  | 2.375696 | 0.361172 | 0.16158  |
| a-Eudesm    | 2.34162  | 0        | 0.142822 | 0.525203 | 0        | 0.701159 | 0        | 0        | 0        | 0        | 0        | 0        | 0        | 0        | 0        | 0.304095 | 0.108236 |
| Bulnesene   | 0        | 0        | 0        | 0        | 0        | 0.26109  | 0        | 0        | 0        | 0        | 0        | 0        | 0        | 0        | 0        | 0        | 0        |
| Guaienol    | 0.869977 | 0        | 0        | 0        | 0        | 0        | 0        | 0        | 0        | 0        | 0        | 0        | 0        | 0        | 0        | 0        | 0        |
| a-Bisbolol  | 2.007734 | 0        | 86.0225  | 0.315687 | 0        | 0.110899 | 0        | 0        | 0        | 0.344756 | 4.094447 | 3.277259 | 0.448446 | 2.739637 | 2.345779 | 0.401166 | 0.178486 |
| neophitac   | 0        | 0        | 0        | 0        | 0        | 0        | 0        | 0        | 0        | 0.641296 | 0.791535 | 1.879748 | 0        | 0.144882 | 0.439691 | 0        | 0        |
| Phytol      | 0        | 0        | 0        | 0        | 0        | 0.031707 | 0        | 0        | 0.168044 | 2.307631 | 0.924184 | 0        | 1.928424 | 0.774587 | 3.887693 | 0        | 0        |
| CBL         | 0        | 0        | 0        | 0        | 0        | 0.062869 | 0        | 0        | 0.037972 | 0        | 0        | 0        | 0        | 0        | 0        | 0        | 0        |
| CBD         | 5.69784  | 0        | 3.590705 | 80.82148 | 0        | 2.538372 | 0.40273  | 0.608904 | 2.272786 | 29.10697 | 23.62056 | 75.43102 | 57.18808 | 78.98588 | 67.7221  | 89.67826 | 46.02702 |
| CBC         | 0        | 0        | 0        | 0        | 0        | 1.922402 | 1.719031 | 0.435065 | 0.279471 | 3.898327 | 3.498281 | 2.751087 | 0.840887 | 1.009289 | 0.852576 | 1.454077 | 0.764841 |
| d8-THC      | 0        | 0        | 0        | 0        | 0        | 0        | 2.815154 | 0        | 0.070191 | 0        | 0        | 0.423982 | 0        | 0        | 0        | 0        | 0        |
| THC         | 0        | 9.666126 | 1.823267 | 3.050723 | 9.666126 | 81.86516 | 83.63616 | 69.90952 | 76.21782 | 41.37048 | 31.90565 | 2.515617 | 5.588576 | 2.699287 | 3.277304 | 3.173532 | 42.9347  |
| CBG         | 0        | 0        | 0        | 9.742831 | 0        | 2.383828 | 4.686823 | 3.428362 | 5.414096 | 0        | 0        | 0        | 0.322073 | 0.487709 | 0.432878 | 1.479963 | 0.873183 |
| CBN         | 0        | 0        | 0        | 0        | 0        | 0.477259 | 0.453295 | 0.259963 | 0.518045 | 0        | 0        | 0        | 0        | 0        | 0        | 0.244282 | 0.445934 |

**Supplementary Table 2.** Statistical correlation between terpenoids and phytocannabinoids in the different strains analyzed.

| A. Strong Correlation       |       |       | B. Non-Specific Correlation (Independent) |       |       | C. Relative Correlation |      |      |
|-----------------------------|-------|-------|-------------------------------------------|-------|-------|-------------------------|------|------|
| Metabolite                  | CBD   | THC   | Metabolite                                | CBD   | THC   | Metabolite              | CBD  | THC  |
| $\beta$ -Ocimene            | -0.19 | 0.57  | $\alpha$ -Pinene                          | -0.25 | -0.24 | $\alpha$ -Farnesene     | 0.25 | 0.03 |
| Linalool                    | -0.42 | 0.32  | Camphene                                  | -0.40 | -0.25 | $\alpha$ -Farnesene     | 0.06 | 0.29 |
| Terpinolene                 | -0.29 | 0.30  | $\beta$ -Pinene                           | -0.45 | -0.29 | CBC                     | 0.17 | 0.23 |
| Thymol                      | -0.34 | 0.62  | $\beta$ -Myrcene                          | -0.47 | -0.14 | CBG                     | 0.07 | 0.37 |
| trans-2-pinanol             | -0.21 | 0.54  | D-Limonene                                | -0.40 | -0.23 |                         |      |      |
| $\gamma$ -Elemene           | -0.08 | 0.06  | Fenchol                                   | -0.43 | -0.25 |                         |      |      |
| $\alpha$ -Guaiene           | -0.17 | 0.21  | Borneol                                   | -0.48 | -0.16 |                         |      |      |
| $\beta$ -Farnesene          | -0.31 | 0.52  | $\alpha$ -Terpineol                       | -0.32 | -0.30 |                         |      |      |
| $\delta$ -Selinene          | -0.30 | 0.44  | $\beta$ -Caryophyllene                    | -0.42 | -0.26 |                         |      |      |
| cis-a-Bulnesene             | -0.32 | 0.58  | trans- $\alpha$ -Bergamontene             | -0.09 | -0.04 |                         |      |      |
| p-Panasinsene               | -0.23 | 0.44  | $\alpha$ -Elemene                         | -0.36 | -0.21 |                         |      |      |
| $\beta$ -sesquiphellandrene | -0.34 | 0.62  | Humulene                                  | -0.32 | -0.34 |                         |      |      |
| cis- $\alpha$ -Bisabolene   | -0.08 | 0.33  | $\alpha$ -Bisabolene                      | -0.18 | -0.23 |                         |      |      |
| Nerolidol                   | -0.40 | 0.76  | Alloaromadendrene                         | -0.35 | -0.21 |                         |      |      |
| Bulnesene                   | -0.23 | 0.44  | Patcholene                                | -0.20 | -0.22 |                         |      |      |
| CBL                         | -0.32 | 0.60  | $\alpha$ -Bisabolene                      | -0.34 | -0.29 |                         |      |      |
| $\delta^8$ -THC             | -0.20 | 0.43  | $\alpha$ -selinene                        | -0.22 | -0.19 |                         |      |      |
| CBN                         | -0.30 | 0.83  | $\alpha$ -Muurolene                       | -0.36 | -0.21 |                         |      |      |
| exo-THC                     | -0.24 | 0.45  | $\beta$ -Cadinene                         | -0.36 | -0.21 |                         |      |      |
| Guaiol                      | 0.37  | -0.40 | Valencene                                 | -0.36 | -0.21 |                         |      |      |
| $\gamma$ -Eudesmol          | 0.33  | -0.38 | Selina-3,7-diene                          | -0.36 | -0.21 |                         |      |      |
| neophitadiene               | 0.33  | -0.20 | $\gamma$ -Elemene                         | -0.38 | -0.18 |                         |      |      |
| Phytol                      | 0.31  | -0.20 | $\alpha$ -Eudesmol                        | -0.14 | -0.17 |                         |      |      |
|                             |       |       | Guaienol                                  | -0.20 | -0.22 |                         |      |      |
|                             |       |       | $\alpha$ -Bisbolol                        | -0.20 | -0.23 |                         |      |      |

**Supplementary Table 3.** Summary of the effective cell death response based on cannabinoids-terpenoids correlation ratios/ranges.

| Cannabinoid                    | IC50 (µg/ml) | Terpenoids                                                                                                                   | Terpenoids Range (µg/ml) | Range of Cell Death Range (%) | Synergistic Cann:Terp Ratio | Maximum Synergistic Cell Death (%) |
|--------------------------------|--------------|------------------------------------------------------------------------------------------------------------------------------|--------------------------|-------------------------------|-----------------------------|------------------------------------|
| <i>A. MDA-MB-231 cell line</i> |              |                                                                                                                              |                          |                               |                             |                                    |
| THC                            | 10           | β -Thujene<br>α -Pinene<br>Camphene<br>β -Pinene<br>α -<br>Phellandrene                                                      | 1-2                      | 30                            | 10:1                        | 40                                 |
| CBD                            | 10           | α -Terpinene<br>β -<br>Phellandrene<br>α -Guaiene<br>γ -Selinene<br>Guaiaadiene<br>δ -Selinene<br>Selinadiene<br>β -Maaliene | 3-0.5                    | 39                            | 10:2                        | 80                                 |
| <i>B. HCT-116 cell line</i>    |              |                                                                                                                              |                          |                               |                             |                                    |
| THC                            | 20           | β -Thujene<br>α -Pinene<br>Camphene<br>β -Pinene<br>α -<br>Phellandrene                                                      | 0.5                      | 20                            | 10:0.25                     | 20                                 |
| CBD                            | 20           | α -Terpinene<br>β -<br>Phellandrene<br>α -Guaiene<br>γ -Selinene<br>Guaiaadiene<br>δ -Selinene<br>Selinadiene<br>β -Maaliene | 2-0.5                    | 33                            | 10:0.25                     | 50                                 |

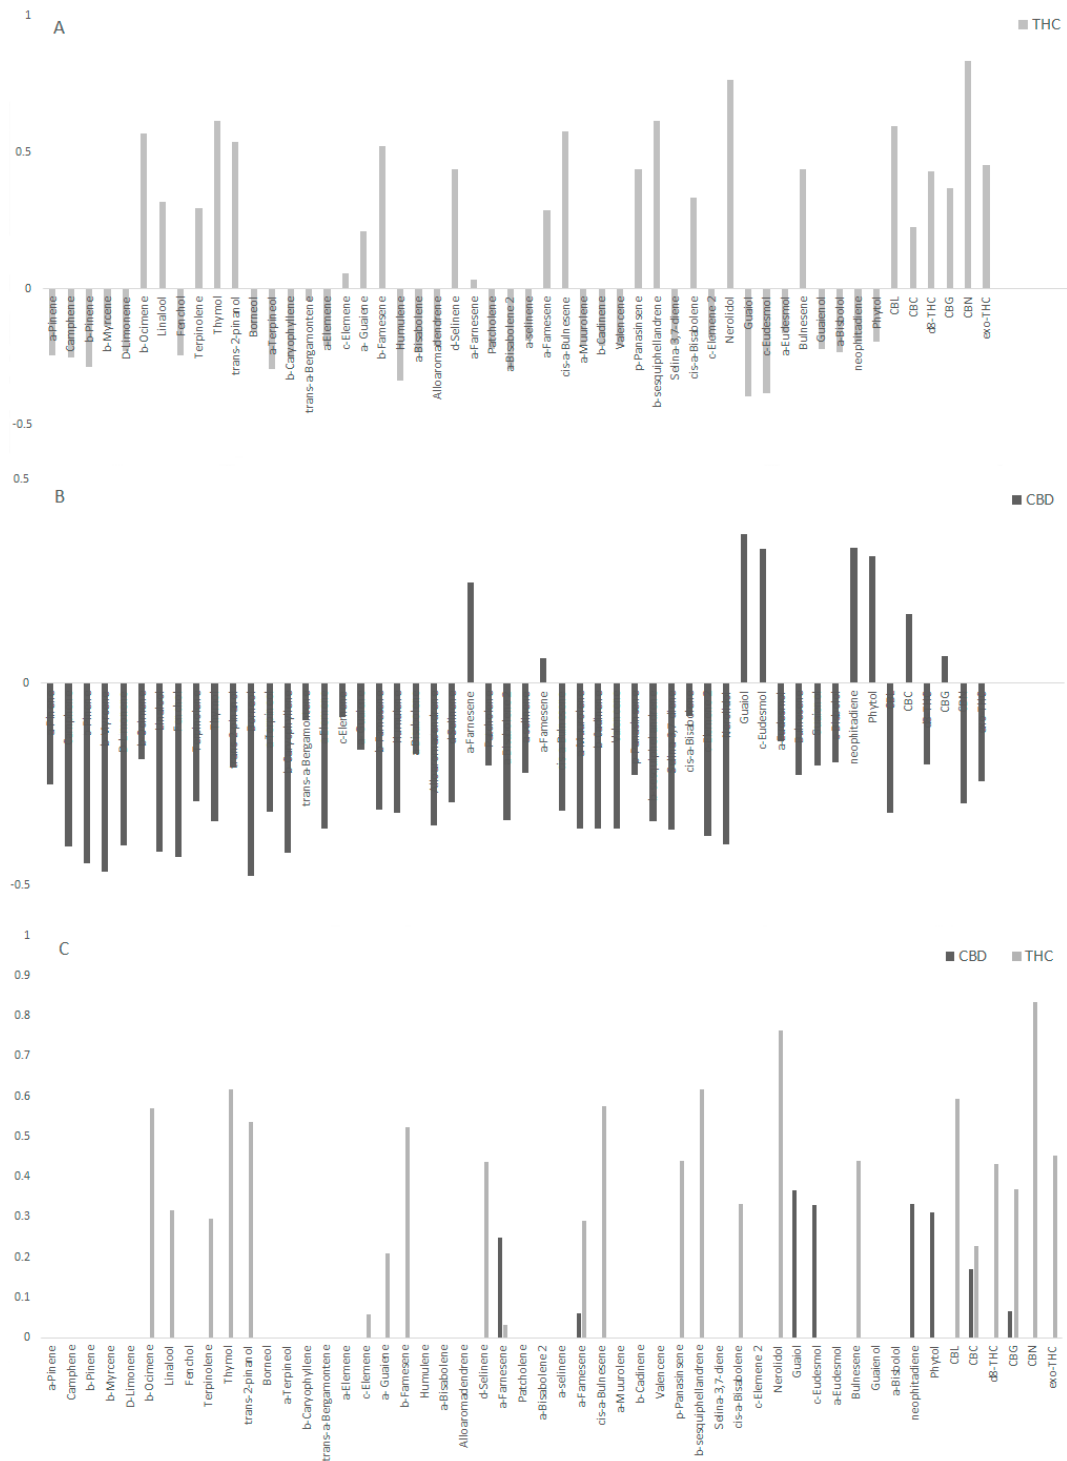

**Supplementary Figure 1.** PCA correlations. PCA showed phytocannabinoid-terpenoid correlation. Only four terpenoids showed absolute and unique correlation with CBD:  $\alpha$ -farnesene,  $\alpha$ -farnesene, guaiol and  $\gamma$ -eudesmol. The negative correlation of these terpenoids to THC shows that these compounds were not produced by any 'high THC' chemotype I plants. For THC, the variability of accompanying terpenoids and terpenoids is broader, containing over 17 different compounds.

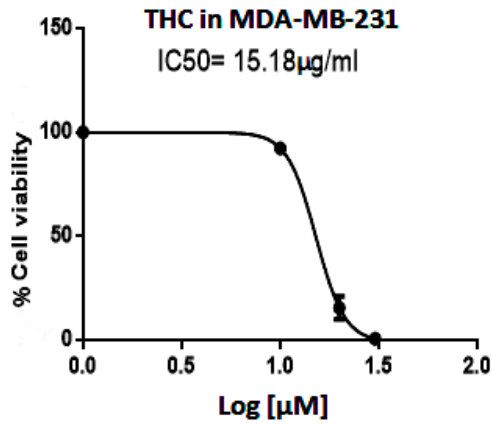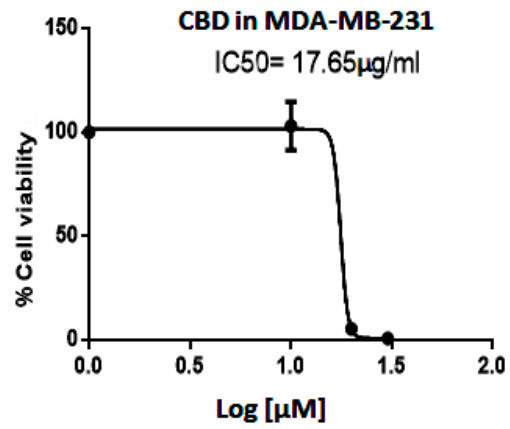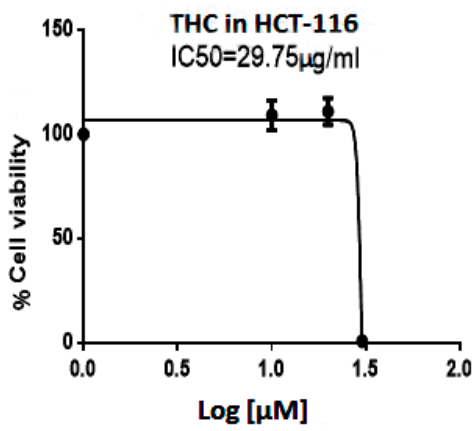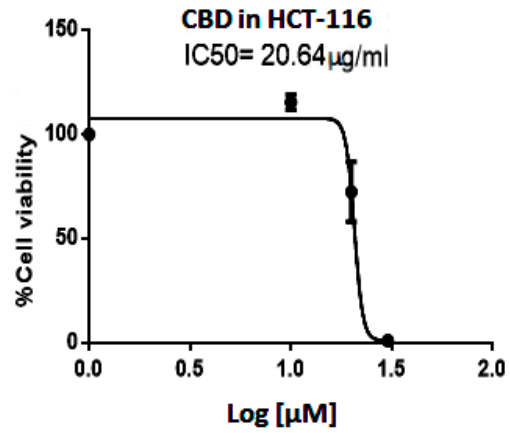

**Supplementary Figure 2.** Dose-effect curves of THC and CBD on the viability of MDA-MB-231 and HCT-116 cell lines. Data points were connected by non-linear regression line of the sigmoidal dose-response relation. GraphPad Prism was used to produce dose-response curve and IC50 doses for THC and CBD.
